# Supplementary material
Source: PubMed Central journal article supplement (PMC4875072)
Supplement: 13238_2010_127_MOESM1_ESM.pdf [file 13238_2010_127_MOESM1_ESM.pdf]

## Supplemental Data

**Table S1. Strains, plasmids and cosmids used in this study**

| Strain/<br>Plasmid/<br>Cosmid | Relevant characteristics*                                                                                                                                                                         | Reference or source             |
|-------------------------------|---------------------------------------------------------------------------------------------------------------------------------------------------------------------------------------------------|---------------------------------|
| <b>Streptomyces Strains</b>   |                                                                                                                                                                                                   |                                 |
| <i>S. chartreusis</i>         | Wild-type of tunicamycin producing strain (NRRL3882)                                                                                                                                              | NRRL                            |
| <i>S. clavuligerus</i>        | A tunicamycin-like antibiotics (MM 19290) producing strain (ATCC 27064)                                                                                                                           | ATCC                            |
| <i>S. lividans</i> TK24       | A derivative of <i>S. lividans</i> 1326                                                                                                                                                           | (Kieser, 2000)                  |
| <i>S. avermitilis</i>         | Model strain for engineered production of tunicamycin (NRRL 8165)                                                                                                                                 | NRRL                            |
| <i>S. albus</i> J1074         | Model strain for engineered production of tunicamycin                                                                                                                                             | (Wendt-Pienkowski et al., 2005) |
| <b>E. coli strains</b>        |                                                                                                                                                                                                   |                                 |
| DH10B                         | F <sup>-</sup> <i>mcrA</i> Δ ( <i>mrr-hsdRMS-mcrBC</i> ) φ80d <i>lacZ</i> Δ M15 Δ <i>lacX74 deoR recA1endA1ara</i> Δ139 D( <i>ara, leu</i> )1697 <i>galU galK</i> λ <sup>-</sup> <i>rpsL nupG</i> | GIBCOBRL                        |
| ET12567 (pUZ8002)             | <i>dam dcm hsdS</i> pUZ8002                                                                                                                                                                       | (Paget et al., 1999)            |
| XLUZ                          | Host cell containing pUZ8002 for construction of genomic cosmid library                                                                                                                           | (Tao <i>et al.</i> unpublished) |
| BW25113/pIJ790                | BW25113 strain bearing pIJ790 used as host cell for PCR-targeting mutation of the target gene                                                                                                     | (Gust et al., 2003)             |
| BL21Gold(DE3)pLys E           | F <sup>-</sup> , <i>ompT, hsdS<sub>B</sub> (r<sub>B</sub><sup>-</sup> m<sub>B</sub><sup>-</sup>)</i> , <i>gal</i> , <i>dcm</i> (DE3), pLysE (Cm <sup>R</sup> )                                    | Stratagene                      |
| <b>Bacillus subtilis</b>      |                                                                                                                                                                                                   |                                 |
|                               | Indicator stain used for bioassay of tunicamycin                                                                                                                                                  | (Tsvetanova and Price, 2001)    |
| <b>Plasmids</b>               |                                                                                                                                                                                                   |                                 |
| pIJ2925                       | <i>bla, lacZ</i>                                                                                                                                                                                  | (Kieser, 2000)                  |
| pBlueScriptII SK(+)           | <i>bla, lacZ, orif1</i>                                                                                                                                                                           | Stratagene                      |
| pSET152                       | <i>aa (3)I V, lacZ, rep<sup>pMB1*</sup> attΦC31, oriT</i>                                                                                                                                         | (Bierman et al., 1992)          |
| pOJ446                        | <i>aa (3)I V, SCP2, rep<sup>pMB1*</sup>, attΦC31, oriT</i>                                                                                                                                        | (Bierman et al., 1992)          |
| SuperCos1                     | <i>neo, bla, cos, ori<sup>pUC</sup></i>                                                                                                                                                           | Stratagene                      |
| pET28a                        | Kan, <i>rep<sup>pMB1</sup></i> , T7 promoter                                                                                                                                                      | Novagen                         |
| pJTU2463                      | A derivative of pOJ446 with SCP2 replicon replaced by <i>int</i> and <i>attP</i> from pSET152                                                                                                     | (Yao <i>et al.</i> unpublished) |
| pJTU2463b                     | A derivative of pJTU2463 with XbaI and SpeI sites blocked                                                                                                                                         | this study                      |
| <b>Cosmid</b>                 |                                                                                                                                                                                                   |                                 |
| 11C3                          | A positive cosmid containing the complete tunicamycin biosynthetic gene cluster                                                                                                                   | this study                      |

|                                |                                                                                 |            |
|--------------------------------|---------------------------------------------------------------------------------|------------|
| 11D8                           | A positive cosmid containing the complete tunicamycin biosynthetic gene cluster | this study |
| pJTU5751a                      | Cosmid 11D8 derivative with XbaI site blocked                                   |            |
| pJTU5751                       | A derivative of 11C3 cosmid with XbaI and SpeI sites blocked                    | this study |
| 12G1                           | A positive cosmid containing the complete tunicamycin biosynthetic gene cluster | this study |
| pJTU5751/-1- <i>neo</i>        | A derivative of pJTU5751 with <i>orf-1</i> was replaced by <i>neo</i> cassette  | this study |
| pJTU5751/ <i>tunL-neo</i>      | A derivative of pJTU5751 with <i>tunL</i> was replaced by <i>neo</i> cassette   | this study |
| pJTU5751/+1- <i>neo</i>        | A derivative of pJTU5751 with <i>orf1</i> was replaced by <i>neo</i> cassette   | this study |
| pJTU5751/ <i>tunA-neo</i>      | A derivative of pJTU5751 with <i>tunA</i> was replaced by <i>neo</i> cassette   | this study |
| pJTU5751/ $\Delta$ <i>tunA</i> | A derivative of pJTU5751/ <i>tunA-neo</i> with <i>neo</i> cassette removed      | this study |

*oriT*, origin of transfer of plasmid RK2; *aac(3)/IV*, apramycin resistance gene; Cm<sup>R</sup>, chloramphenicol resistance gene; *neo*, Neomycin resistance gene; Kan, kanamycin resistance gene; Center; rep<sup>DMB1\*</sup>, mutated rep<sup>DMB1</sup>.

**Table S2. PCR primers used in this study**

| primers   | sequence                                                              |
|-----------|-----------------------------------------------------------------------|
| Orf-1tgtF | 5'-CTGCGACGCCCGGCACCCCGGCGGCGTGGTGCTCCGGCT<br>TCTAGAGCTATTCCAGAAGT-3' |
| Orf-1tgtR | 5'-GTCGATCCGTTTCGTAGTCCGGTCGCCACTCGCGCGTGAT<br>ACTAGTCTGGATGCCGACG-3' |
| Orf-1exF  | 5'-CCATATGTTCCGCCACACCCCGCAG-3'                                       |
| Orf-1exR  | 5'-GGAATTCAGGAGGTAGTCGCCCA-3'                                         |
| TunLtgtF  | 5'-CAGCGGTCCACGCCGGTCTGCTACTCGTCCTCGTCACCT<br>TCTAGAGCTATTCCAGAAGT-3' |
| TunLtgtR  | 5'-ACGGGCCTCGCGTTGCAAGCGGCGGACTGACTGGCGGTG<br>ACTAGTCTGGATGCCGACG-3'  |
| TunLexF   | 5'-CCATATGATCCGAAACCACTCCGGC-3'                                       |
| TunLexR   | 5'-GGAATTCATGACACGGGCTCGTC-3'                                         |
| Orf1tgtF  | 5'-AAGGGCCCTTGAGGTGGGCTGCGGCACAGGGAGGTTTGC<br>TCTAGAGCTATTCCAGAAGT-3' |
| Orf1tgtR  | 5'-AGGAGGCGCCGAATCCGCCTGCCTGGAAGATATTCAGCA<br>ACTAGTCTGGATGCCGACG-3'  |
| Orf1exF   | 5'-CCATATGTGCCGTTCAACCACAAC-3'                                        |
| Orf1exR   | 5'-GGAATTCTAATCACTTCCCAGCCC-3'                                        |
| TunAtgtF  | 5'-ATCGGTGGCCACCTTGCCCGCGCACTGGTGGCGTCCGGG                            |

---

|          |                                                                       |
|----------|-----------------------------------------------------------------------|
|          | TCTAGAGCTATTCCAGAAGT-3'                                               |
| TunAtgtR | 5'-ACGCTGCTCACCGTCGCCCTCGACAGGCAGTTCGTTCCCT<br>ACTAGTCTGGATGCCGACG-3' |
| TunAidF  | 5'-CCATATGCAAAGAAACACTTTGAA-3'                                        |
| TunAidR  | 5'-GGAATTCTAGAGGATCCGGATGACG-3'                                       |

---

**Table S3. Comparative analysis of the homologies of the *tun* genes with different origins**

| gene | aa<br>(3882/27074/43827)* | <i>S. clavuligerus</i> ATCC<br>27074<br>(identity, positives, %) | <i>A. mirum</i> DSM 43827<br>(identity, positives, %) |
|------|---------------------------|------------------------------------------------------------------|-------------------------------------------------------|
| A    | 321/323/322               | 226/312 (72%), 253/312 (81%)                                     | 164/300 (54%), 197/300 (65%),                         |
| B    | 338/338/340               | 305/338 (90%), 323/338 (95%)                                     | 267/340 (78%), 298/340 (87%),                         |
| C    | 318/322/318               | 194/323 (60%), 233/323 (72%)                                     | 140/323 (43%), 185/323 (57%)                          |
| D    | 472/461/451               | 296/461 (64%), 358/461 (77%)                                     | 217/457 (47%), 269/457 (58%)                          |
| E    | 234/236/230               | 171/221 (77%), 190/221 (85%)                                     | 146/229 (63%), 175/229 (76%)                          |
| F    | 327/327/332               | 249/327 (76%), 274/327 (83%)                                     | 146/229 (63%), 175/229 (76%)                          |
| G    | 203/208/223               | 120/184 (65%), 135/184 (73%)                                     | 94/185 (50%), 112/185 (60%)                           |
| H    | 515/518/510               | 339/511 (66%), 389/511 (76%)                                     | 270/504 (53%), 328/504 (65%)                          |
| I    | 304/302/302               | 235/306 (76%), 270/306 (88%)                                     | 180/296 (60%), 218/296 (73%)                          |
| J    | 262/261/253               | 197/259 (76%), 217/259 (83%)                                     | 148/242 (61%), 189/242 (78%)                          |
| K    | 81/81/79                  | 52/79 (65%), 69/79 (87%)                                         | without obvious homology                              |
| L    | 229/223                   | 97/186 (52%), 126/186 (67%)                                      | missing in DSM 43827                                  |

\*(3882/27074/43827) means that proteins involved in confirmed/potential tunicamycin biosynthetic pathways were originated from *S. chartreusis* NRRL 3882, *S. clavuligerus* ATCC 27074, and *A. mirum* DSM 43827, respectively.

### **Mutation of the targeted genes for the boundaries determination of the tunicamycin gene cluster**

For *orf-1* disruption, a ca.1.5-kb *neo* cassette as selectable marker was amplified by rTaq DNA polymerase (Takara) with primers Orf-1tgtF and Orf-1tgtR. Subsequently, the cassette was recombined into the *orf-1* to give pJTU5751/-1-*neo* via PCR-targeting technology (Gust et al., 2003), and the primers orf-1exF and orf-1exR

were used for identification of the *orf-1* mutation. Similarly, *tunL* and *orf1* mutant cosmids were individually constructed as pJTU5751/*tunL-neo* and pJTU5751/*1-neo*.

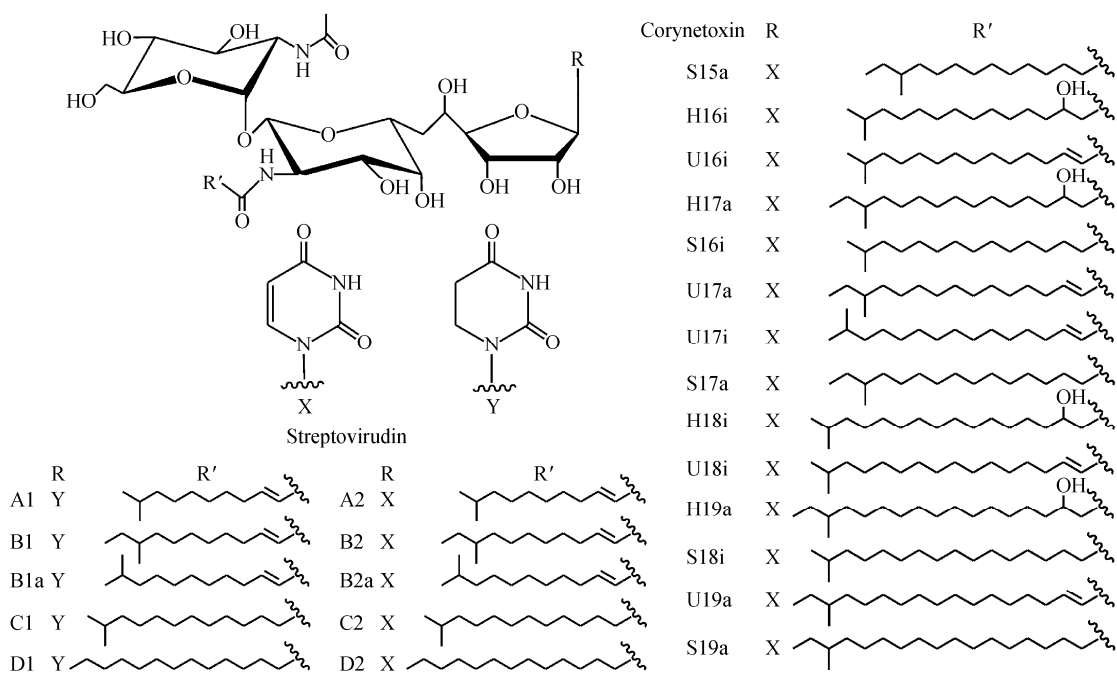

**Figure S1. Chemical structures of streptovirudin and corynetoxin.** All components of corynetoxin and streptovirudin differ only in N-acyl chain and/or substitution of 5, 6-dihydrouracil for uracil group.

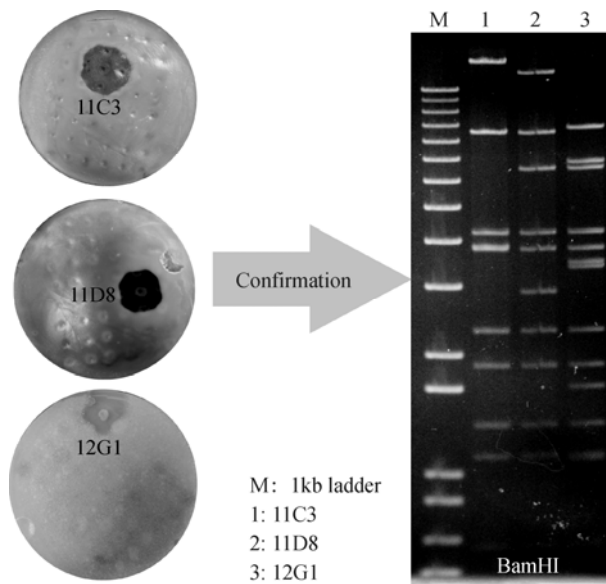

**Figure S2. Screening of the positive cosmids via high-throughput heterologous expression (HHE) strategy.** Left: Screening of the positive *S. lividans* TK24 recombinants combining HHE strategy and Bioassay. Right: Confirmation of the correlations among the three positive cosmid. The three cosmids were digested by *Bam*HI.

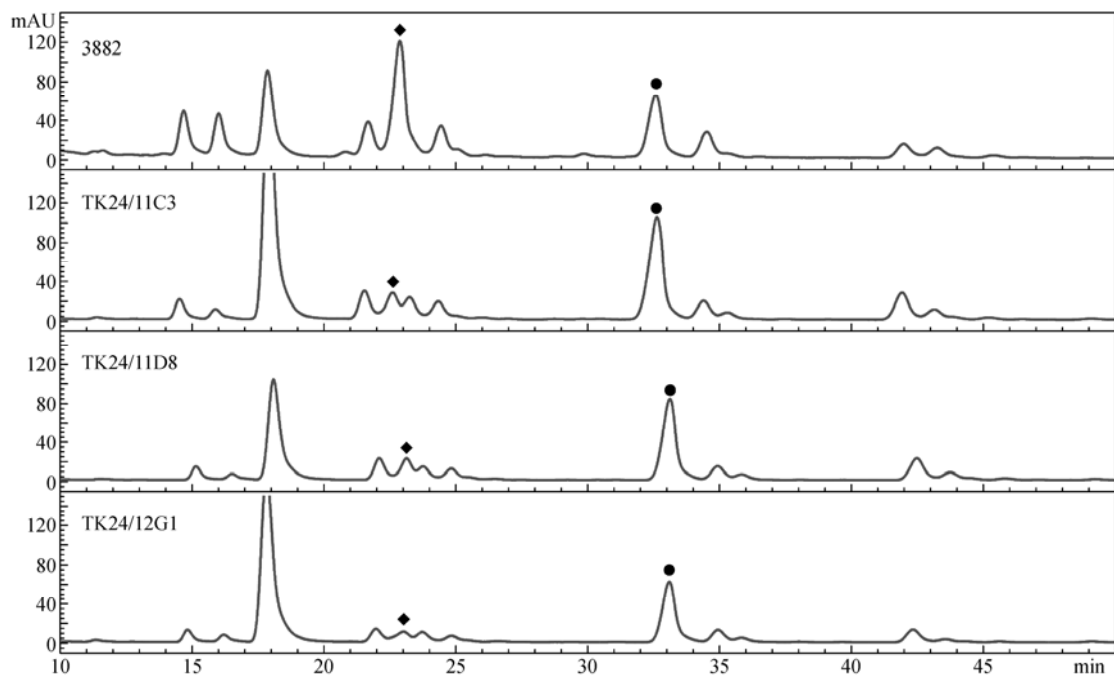

**Figure S3. HPLC analysis of the metabolites produced *S. lividans* TK24 recombinants.** The sample of *S. charteus* wild type (3882) was used as positive control, and the samples of *S. lividans* recombinants carrying the positive cosmids were correspondingly indicated as TK24/11C3, TK24/11D8 and TK24/12G1. (◆): Tun 15:1<sub>B</sub>, (●): Tun 16:1<sub>A</sub>.

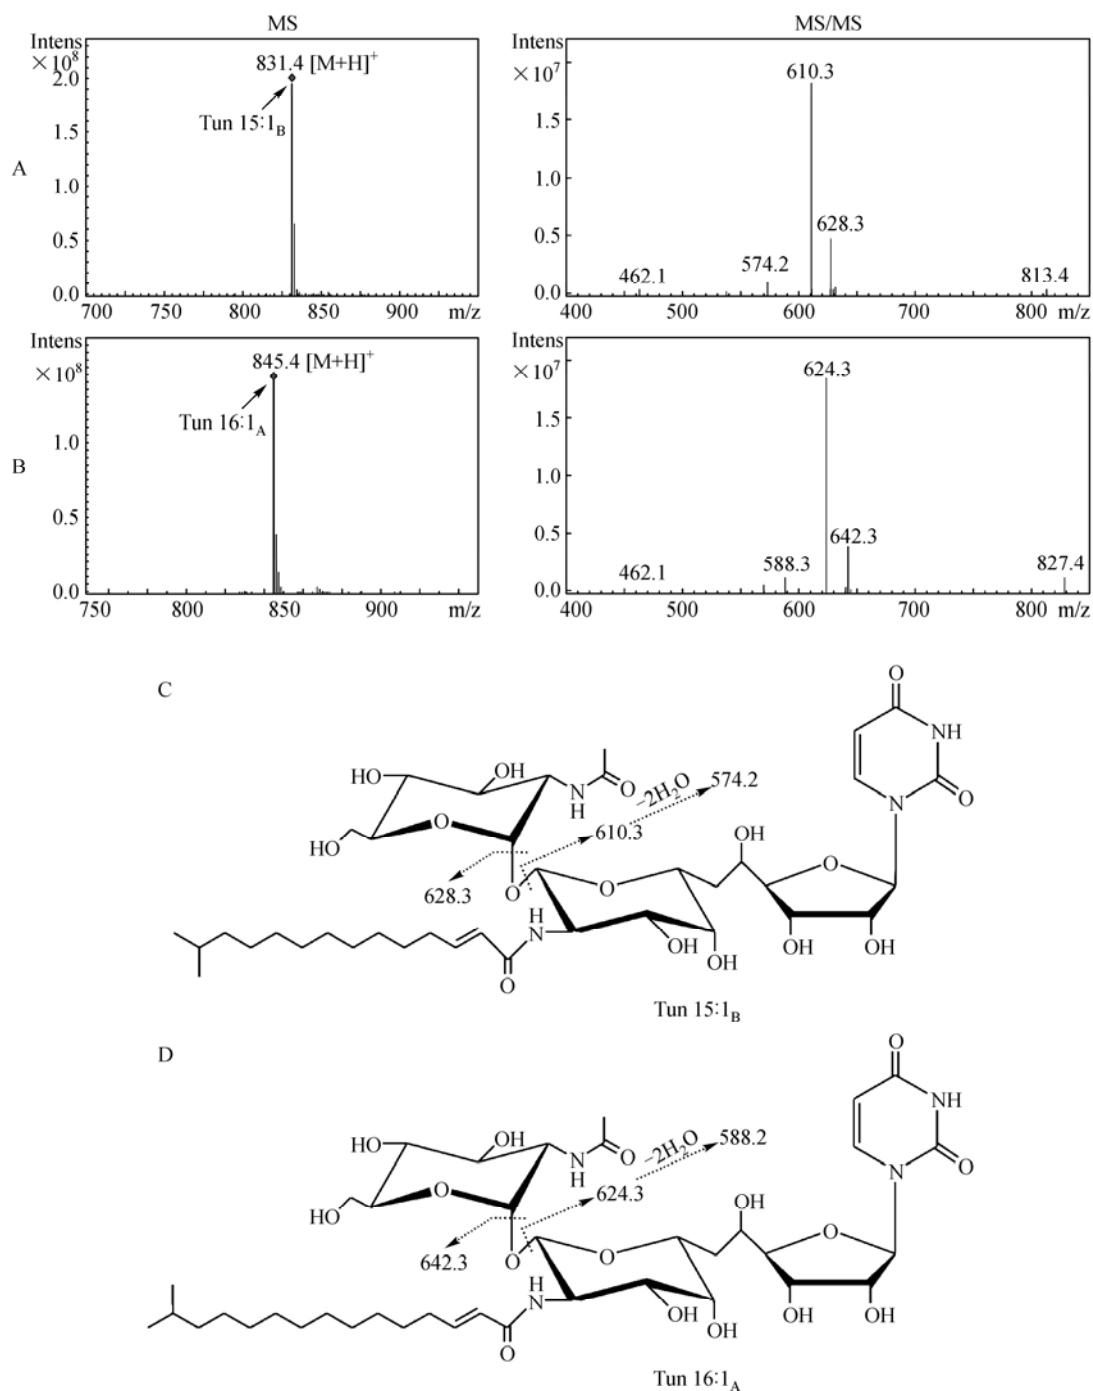

**Figure S4. MS and MS/MS analysis of the Tun 15:1<sub>B</sub> and Tun16:1<sub>A</sub> components of tunicamycin standard.** (A) MS and MS/MS analysis of the Tun 15:1<sub>B</sub> component. The component generated a [M+H]<sup>+</sup> ion at m/z 831.4, which was fragmented into main ions of 610.3, 628.3, 574.2, etc. (B) MS and MS/MS analysis of the Tun 16:1<sub>A</sub> component. The component generated a [M+H]<sup>+</sup> ion at m/z 845.4, which was fragmented into main ions of 624.3, 642.3, 588.3, etc. (C) MS/MS fragmentation pattern of the Tun 15:1<sub>B</sub>. (D) MS/MS fragmentation pattern of the Tun 16:1<sub>A</sub>.



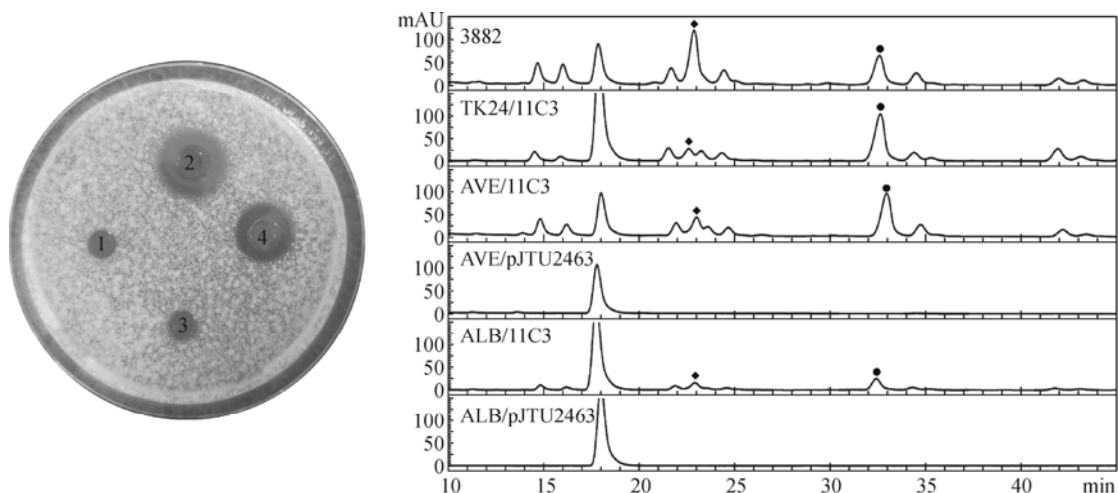

**Figure S5. Analysis of the metabolites produced related *Streptomyces* recombinants containing *tun* cluster.** Left: Bioassay of the metabolites produced by recombinants of *S. avermitilis*/11C3 (2) and *S. albus*/11C3 (4). The samples of *S. avermitilis*/pJTU2463 (1) and *S. albus*/pJTU2463 (2) were used as negative control. Right: HPLC analysis of the metabolites produced by related recombinants. Samples of *S. chartensis* (3882) and *S. lividans* TK24/11C3 (TK24/11C3), *S. albus*/pJTU2463 (ALB/pJTU2463) and *S. avermitilis*/pJTU2463 (AVE/pJTU2463), and *S. avermitilis*/11C3 (AVE/11C3) as well as *S. albus*/11C3 (ALB/11C3) were compared. (◆): Tun 15:1<sub>B</sub>, (●): Tun 16:1<sub>A</sub>.

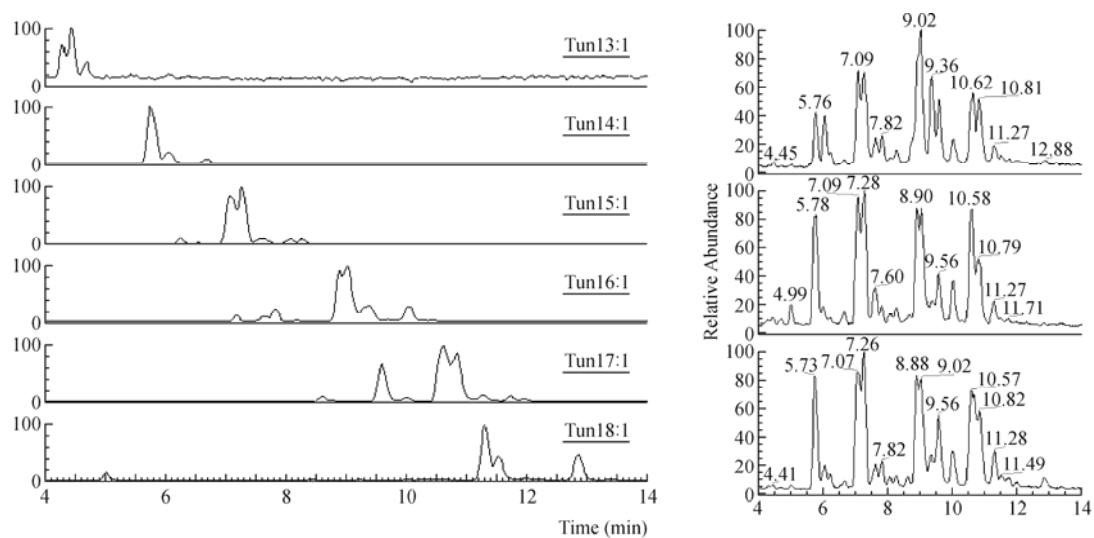

**Figure S6. Tunicamycin MS profiles for related *Streptomyces* recombinants.**

Left: Pile-up of selective ion monitored (SIM) LC-MS chromatographs of *S. lividans* TK24:11C3. Right: LC-SIM-MS chromatographs of transconjugate strains: (A) *S. albus*:11C3; (B) *S. avermitilis*:11C3; TK24:11C3. Ion extractions are as follows:  $m/z$  825-826 (Tun13:1),  $m/z$  839-840 (Tun14:1),  $m/z$  853-854 (Tun15:1),  $m/z$  866-867 (Tun16:1),  $m/z$  881-882 (Tun17:1),  $m/z$  895-896 (Tun18:1). The retention times are shown in minutes (min).

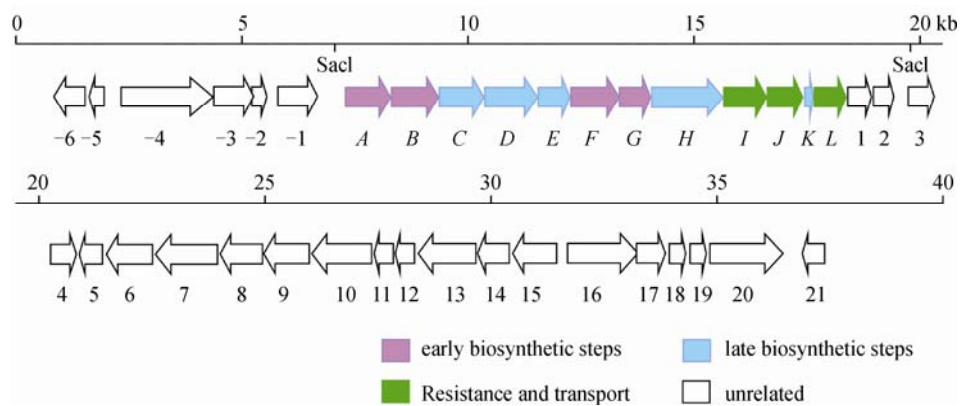

**Figure S7. Genetic organization of the sequenced cosmid 11C3 containing the *tun* gene cluster.** The sequenced region was revealed to contain 39 ORFs, 12 of which constituted the minimal gene cluster of tunicamycin.

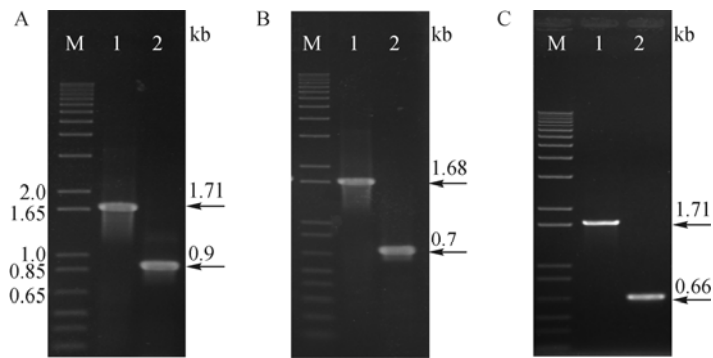

**Figure S8. PCR identification of the mutant pJTU5751 cosmids for boundaries determination.** (A) PCR identification of *orf-1* mutation in pJTU5751, as ca. 0.7-kb of *orf-1* gene was replaced by ca. 1.5-kb *neo* cassette, the resultant *orf-1* mutant cosmid produces 1.71-kb PCR product, and the intact pJTU5751 gives a PCR product of 0.9-kb. (B) PCR confirmation of *tunL* mutation in pJTU5751, as ca. 0.5-kb of *orf-1* gene was replaced by ca. 1.5-kb *neo* cassette, the resultant *tunL* mutant cosmid produces 1.68-kb PCR product, while the intact pJTU5751 gives a PCR product of 0.7-kb. (C) PCR identification of *orf1* mutation in pJTU5751, ca. 0.45-kb of *orf1* gene was replaced by ca. 1.5-kb *neo* cassette, accordingly, the *orf1* mutant cosmid produces 1.71-kb PCR product, and the intact pJTU5751 gives a PCR product of 0.66-kb.

## REFERENCES

- Bierman, M., Logan, R., O'Brien, K., Seno, E.T., Rao, R.N., and Schoner, B.E. (1992). Plasmid cloning vectors for the conjugal transfer of DNA from *Escherichia coli* to *Streptomyces* spp. *Gene* 116, 43–49.
- Gust, B., Challis, G.L., Fowler, K., Kieser, T., and Chater, K.F. (2003). PCR-targeted *Streptomyces* gene replacement identifies a protein domain needed for biosynthesis of the sesquiterpene soil odor geosmin. *Proc Natl Acad Sci U S A* 100, 1541–1546.
- Kieser, T., M. J. Bibb, K. F. Chater, M. J. Butter, and D. A. Hopwood. (2000). *Practical Streptomyces Genetics*, 2<sup>nd</sup> ed., John Innes Foundation, Norwich, United Kingdom.
- Paget, M.S., Chamberlin, L., Atrih, A., Foster, S.J., and Buttner, M.J. (1999). Evidence that the extracytoplasmic function sigma factor sigmaE is required for normal cell wall structure in *Streptomyces coelicolor* A3(2). *J Bacteriol* 181, 204–211.
- Tsvetanova, B.C., and Price, N.P. (2001). Liquid chromatography-electrospray mass spectrometry of tunicamycin-type antibiotics. *Anal Biochem* 289, 147–156.
- Wendt-Pienkowski, E., Huang, Y., Zhang, J., Li, B., Jiang, H., Kwon, H., Hutchinson, C.R., and Shen, B. (2005). Cloning, sequencing, analysis, and heterologous expression of the fredericamycin biosynthetic gene cluster from *Streptomyces griseus*. *J Am Chem Soc* 127, 16442–16452.
